# Supplementary material
Source: Springer Nature journal article supplement (https://www.springermedizin.de/resource/supplementary/12947_2012_439_MOESM5_ESM.pdf/9555760)
Supplement: MOESM5 [file 9555760]

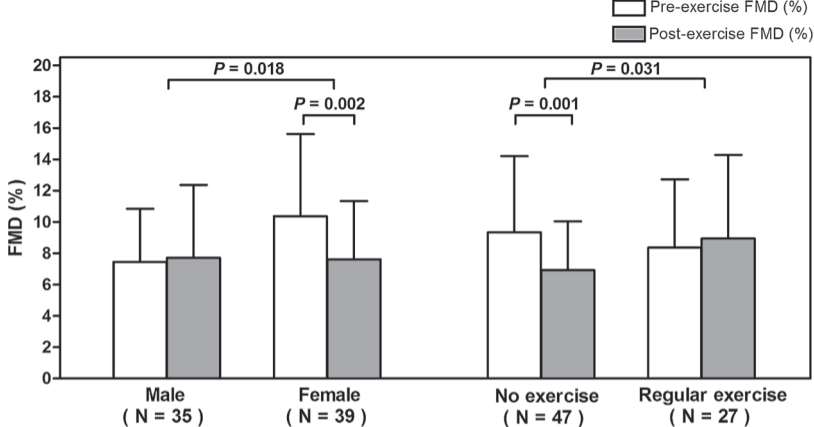

|                           | Pre-exercise FMD (%) | Post-exercise FMD (%) | $P$ value* | $P$ value†  |
|---------------------------|----------------------|-----------------------|------------|-------------|
| Male (N = 35)             | 7.44 ± 3.41          | 7.71 ± 4.66           | 0.622      | 0.018       |
| Female (N = 39)           | 10.36 ± 5.26         | 7.62 ± 3.71           | 0.002      | (F = 5.852) |
| No exercise (N = 47)      | 9.34 ± 4.87          | 6.92 ± 3.13           | 0.001      | 0.031       |
| Regular exercise (N = 27) | 8.36 ± 4.37          | 8.95 ± 5.33           | 0.436      | (F = 4.836) |
